# Supplementary material for: Analysis and prediction of research hotspots and trends in heart failure research
Source: PubMed Central journal article supplement (PMC11284256; doi:10.2478/jtim-2023-0117), 2024-07-27
Supplement: jtim-2023-0003_sm.pdf [file jtim-2023-0003_sm.pdf]

# **Analysis and Prediction of Research Hotspots and Trends in Heart Failure Research**

**Running title:** AI-based insight into the wave of heart failure research

This PDF file includes:

## **Supplemental Figures and Figure Legends**

Figure S1

## **Supplemental Tables and supporting information**

Table S1-S2

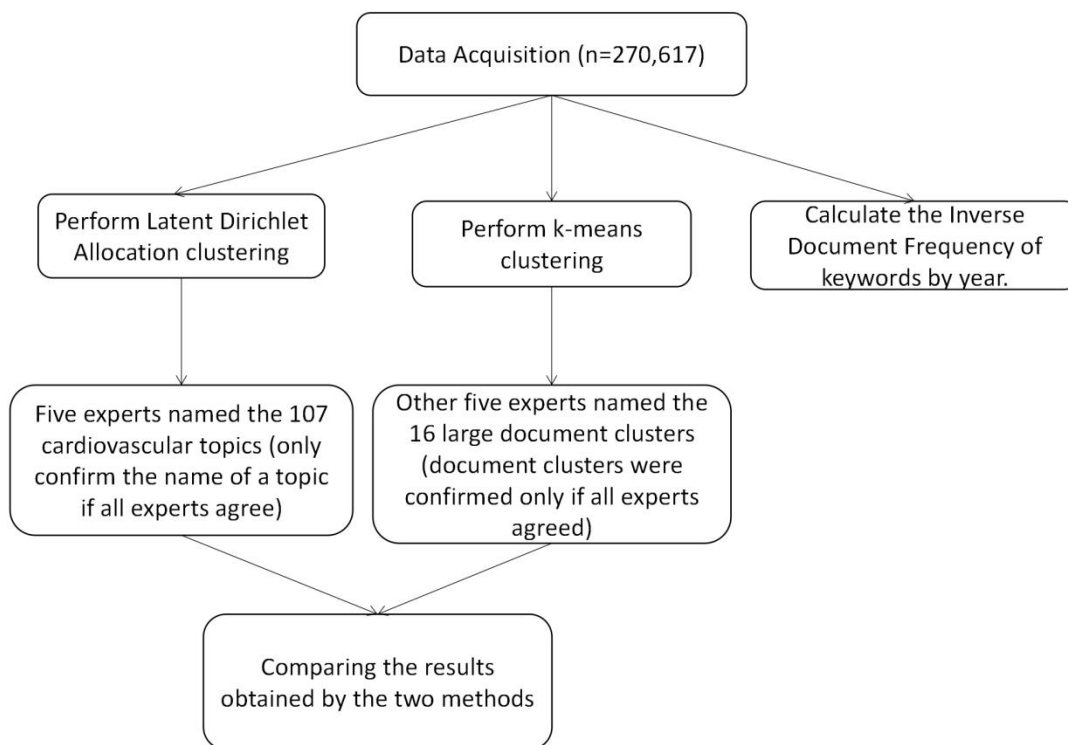

**Figures S1.** Schematic diagram of the main flow of the study

**Table S1.** All of the 107 LDA topics

| Research Field | LDA Topics                                                            |
|----------------|-----------------------------------------------------------------------|
| basic          | Stem cells, genetics, and gene editing                                |
| basic          | The role of enzymes in the progression of heart failure               |
| basic          | Immune cells and immune regulation                                    |
| basic          | Programmed cell death                                                 |
| basic          | Cells and extracellular matrix                                        |
| basic          | Cell regeneration and signaling pathways                              |
| basic          | Cardiac hypertrophy, fibrosis, and remodeling                         |
| basic          | Cardiomyocyte ultrastructure, energy metabolism, and signaling        |
| basic          | Gene therapy for heart failure                                        |
| basic          | Hemodynamic studies related to heart failure                          |
| basic          | Function and role of mitochondria in heart failure                    |
| basic          | Cardiotoxic effects of drugs                                          |
| basic          | Oxygen metabolism and heart failure                                   |
| basic          | Nitric oxide and heart failure                                        |
| basic          | Genetics and single nucleotide polymorphisms                          |
| basic          | The role of adipose tissue in heart failure                           |
| basic          | Translational Research                                                |
| clinical       | COVID-19 and heart failure                                            |
| clinical       | ECMO therapy                                                          |
| clinical       | The role of NT-proBNP in the diagnosis and treatment of heart failure |

clinical Methods of monitoring disease conditions

clinical Infectious diseases and heart failure

clinical Effect of obesity and lipids on heart failure

clinical Diabetes and heart failure

clinical Proteins and enzymes

clinical Amyloidosis and heart failure

clinical Treatment of mitral valve lesions - surgical and interventional

clinical Treatment with radioactive iodine

clinical Pulmonary hypertension and heart failure

clinical Peritoneal dialysis treatment

clinical Hypertension - diagnosis, monitoring, and treatment

clinical Bone marrow and hematopoiesis

clinical Coronary artery lesions and heart failure

clinical Acute coronary syndrome and myocardial injury

clinical Acute myocardial infarction - interventional and pharmacological treatment

clinical Coronary lesions - diagnosis, treatment, and prognosis

clinical Treatment of acute heart failure - characteristics, influencing factors, and prognosis

clinical Parasitic infections and heart failure

clinical Mechanism and application of antagonist drugs

clinical Precision medicine and telemedicine

clinical Dilated cardiomyopathy - etiology, diagnosis, and treatment

clinical Methodology of clinical trials

clinical Metabolism of sodium and heart failure

clinical Endocrine-related diseases (excluding diabetes) and heart failure

clinical Coagulation, anticoagulation, and atrial fibrillation

clinical Characteristics of heart failure in women

clinical Anemia and heart failure

clinical Potassium metabolism and cardiotonic drugs - effects on patients with heart failure

clinical Effect of ejection fraction on the treatment and prognosis of patients with heart failure

clinical Neurological activity and heart failure

clinical Renin-angiotensin-aldosterone system

clinical Changes in the cardiovascular system during aging

clinical Minimally invasive surgery and assistive devices

clinical Heart failure due to congenital heart disease

clinical Pericardial disease and heart failure

clinical Heart failure due to cardiomyopathy - mechanism, diagnosis, and treatment

clinical Heart failure after myocardial infarction - treatment and prognosis

clinical Pacing therapy for arrhythmias

clinical Treatment of the cardiorenal syndrome

clinical Heart failure and complications in infants and children

clinical Remote and home monitoring of heart failure

clinical Diagnosis and differential methods of heart failure

clinical Intensive care treatment of heart failure

clinical Effects of heart failure on the kidneys

clinical Risk score and stratification of heart failure

|            |                                                                                       |
|------------|---------------------------------------------------------------------------------------|
| clinical   | Risk factors and predictive models for heart failure                                  |
| clinical   | Related care, palliative care, and quality of life in patients with heart failure     |
| clinical   | Care and patient education in heart failure                                           |
| clinical   | Psychosocial care for patients with heart failure                                     |
| clinical   | Water-electrolyte balance and micronutrient supplementation in heart failure patients |
| clinical   | Care and readmission of patients with heart failure                                   |
| clinical   | Emergency treatment of heart failure                                                  |
| clinical   | Management and rehabilitation of heart failure disease                                |
| clinical   | Biomarkers and predictive models of heart failure                                     |
| clinical   | Risk factors and markers of heart failure                                             |
| clinical   | Minimally invasive treatment of heart failure - transcatheter valve replacement       |
| clinical   | Evaluation of drug therapy for heart failure                                          |
| clinical   | Heart failure and liver dysfunction                                                   |
| clinical   | Heart failure and respiratory sleep disorders                                         |
| clinical   | Heart failure and thyroid function                                                    |
| clinical   | Heart failure and congenital defects                                                  |
| clinical   | Heart failure and cardiac tumors                                                      |
| clinical   | Heart failure and serum proteins                                                      |
| clinical   | Minimally invasive treatment for heart failure - TAVI                                 |
| clinical   | Treatment of heart failure - diuretics                                                |
| clinical   | Treatment of heart failure - ventricular assist device                                |
| clinical   | Medications for heart failure                                                         |
| clinical   | Cardiovascular-associated infectious diseases and heart failure                       |
| clinical   | Heart transplant                                                                      |
| clinical   | Cardiac resynchronization therapy for heart failure                                   |
| clinical   | 3D Echocardiography and 3D Printing                                                   |
| clinical   | Vasoactive drugs and the treatment of heart failure                                   |
| clinical   | Endovascular stents                                                                   |
| clinical   | Hemodynamics and heart failure                                                        |
| clinical   | Cardiovascular effects of blood glucose control drugs                                 |
| clinical   | Evidence-based medical research                                                       |
| clinical   | Research on artificial intelligence and heart failure                                 |
| clinical   | Cardiovascular effects of malnutrition                                                |
| clinical   | Imaging - ultrasound, and MRI                                                         |
| clinical   | The role of exercise in the diagnosis and rehabilitation of heart failure             |
| clinical   | Surgical treatment of aortic lesions and complications                                |
| population | Public health, socioeconomic, and digital health                                      |
| population | Impact of environmental factors on cardiovascular health                              |
| population | Cardiovascular effects of air pollution                                               |
| population | Regional distribution and utilization of healthcare related to heart failure          |
| population | Cost and utilization of health care services related to heart failure                 |
| population | Health economics of the treatment and care of heart failure                           |

---

OCT= optical coherence tomography  
 COPD=chronic obstructive pulmonary disease  
 MRI=magnetic resonance imaging  
 CT=computed tomography  
 ECG=electrocardiogram  
 CABG=coronary artery bypass graft  
 ECMO= Extracorporeal Membrane Oxygenation  
 TAVI=Transcatheter Aortic Valve Implantation

**Table S2. The complete list of keywords for 1947–2021**

| Year | keywords 1                                      | keywords 2                       | keywords 3                   |
|------|-------------------------------------------------|----------------------------------|------------------------------|
| 2021 | vericiguat                                      | sars-cov-2                       | ferroptosis                  |
| 2020 | severe acute respiratory syndrome coronavirus 2 | coronavirus disease 2019         | coronavirus                  |
| 2019 | atherosclerotic cardiovascular disease          | cardiovascular outcome trials    | transcription                |
| 2018 | cardiac risk factors and prevention             | acute ischemic stroke            | cardiac stem cells           |
| 2017 | periodic breathing                              | tachycardia, ventricular         | family                       |
| 2016 | LCZ696interN-3                                  | marfan syndrome                  | kidney failure, chronic      |
| 2015 | biological markers                              | myocytes                         | valve surgery                |
| 2014 | biological markers                              | waist circumference              | heartware                    |
| 2013 | hazard ratio                                    | hazard ratio                     | new york heart association   |
| 2012 | heart atria                                     | dronedarone                      | rhabdomyolysis               |
| 2011 | angioplasty                                     | angioplasty                      | dronedarone                  |
| 2010 | healthcare disparities                          | dronedarone                      | eisenmenger syndrome         |
| 2009 | angiotensin ii receptor blockers                | angiotensin ii receptor blockers | myocardial revascularization |
| 2008 | cardiac myocytes                                | cardiac myocytes                 | renin angiotensin system     |
| 2007 | menopause                                       | schizophrenia                    | animals                      |
| 2006 | myocyte                                         | pharmacogenomics                 | regurgitation                |

|      |                                    |                                     |                                     |
|------|------------------------------------|-------------------------------------|-------------------------------------|
| 2005 | biomedical and behavioral research | health care and public health       | death and euthanasia                |
| 2004 | health care and public health      | biomedical and behavioral research  | empirical approach                  |
| 2003 | non-programmatic                   | biomedical and behavioral research  | professional patient relationship   |
| 2002 | non-programmatic                   | biomedical and behavioral research  | empirical approach                  |
| 2001 | nasa discipline cardiopulmonary    | non-nasa center                     | prednisone                          |
| 2000 | empirical approach                 | nasa discipline cardiopulmonary     | non-nasa center                     |
| 1999 | nasa discipline cardiopulmonary    | non-nasa center                     | death and euthanasia                |
| 1998 | non-nasa center                    | nasa discipline cardiopulmonary     | death and euthanasia                |
| 1997 | studies                            | non-nasa center                     | death and euthanasia                |
| 1996 | age factors                        | recommendations                     | population characteristics          |
| 1995 | developing countries               | population dynamics                 | age factors                         |
| 1994 | professional patient relationship  | contraception                       | death and euthanasia                |
| 1993 | population characteristics         | demographic factors                 | cardiovascular effects              |
| 1992 | nasa discipline cardiopulmonary    | signs and symptoms                  | causes of death                     |
| 1991 | developed countries                | population dynamics                 | studies                             |
| 1990 | leukemia                           | developed countries                 | contraception                       |
| 1989 | professional patient relationship  | death and euthanasia                | empirical approach                  |
| 1988 | developed countries                | studies                             | family planning                     |
| 1987 | population dynamics                | demographic factors                 | causes of death                     |
| 1986 | cardiovascular effects             | oral contraceptives--side effects   | contraceptive methods--side effects |
| 1985 | oral contraceptives--side effects  | contraceptive methods--side effects | biomedical and behavioral research  |
| 1984 | oral contraceptives--side effects  | contraceptive methods--side effects | cardiovascular effects              |
| 1983 | oral contraceptives--side effects  | contraceptive methods--side effects | family planning                     |
| 1982 | reproduction                       | biology                             | signs and symptoms                  |
| 1981 | population dynamics                | demographic factors                 | causes of death                     |
| 1980 | developing countries               | health                              | delivery of health care             |
| 1979 | developed countries                | family planning                     | demographic factors                 |
| 1977 | reproduction                       | family planning                     | biology                             |
| 1976 | endoscopy                          | studies                             | diseases                            |
| 1975 | oral contraceptives--side effects  | contraceptive methods--side effects | contraception                       |
| 1974 | age factors                        | research methodology                | reproduction                        |

|      |                                         |                                        |                                        |
|------|-----------------------------------------|----------------------------------------|----------------------------------------|
| 1973 | delivery                                | catheter                               | reproduction                           |
| 1972 | oral contraceptives--side effects       | contraceptive methods--side effects    | cardiovascular effects                 |
| 1970 | united states                           | family planning                        | surgery                                |
| 1969 | studies                                 | cardiovascular effects                 | research methodology                   |
| 1967 | oral contraceptives--side effects       | contraceptive methods--side effects    | neoplasms                              |
| 1965 | drug therapy                            | toxicologic report                     | blood gas analysis                     |
| 1964 | surgery, operative                      | kidney failure, acute                  | triamterene                            |
| 1963 | pulmonary valve stenosis                | diet therapy                           | diuretics, mercurial                   |
| 1962 | digitalis/therapy                       | chlorothiazide/related compounds       | heart failure, congestive/blood        |
| 1961 | heart failure, congestive/complications | heart failure, congestive/diagnosis    | diuretics/therapy                      |
| 1960 | heart failure, congestive/complications | heart failure, congestive/physiology   | heart failure, congestive/diagnosis    |
| 1959 | acetazolamide/related compounds         | heart failure, congestive/metabolism   | heart failure, congestive/pathology    |
| 1958 | acetazolamide/related compounds         | congestive heart failure/metabolism    | body fluid balance                     |
| 1957 | body fluid balance                      | congestive heart failure/metabolism    | congestive heart failure/in aged       |
| 1956 | congestive heart failure/in aged        | cardiac glycosides/therapeutic use     | strophanthin/therapeutic use           |
| 1955 | congestive heart failure/metabolism in  | diuretics/therapeutic use              | electrolytes/metabolism                |
| 1954 | cardiac glycosides/therapeutic use      | congestive heart failure/complications | lungs/diseases                         |
| 1953 | water/metabolism                        | lungs/diseases                         | congestive heart failure/metabolism in |
| 1952 | resins                                  | congestive heart failure/surgery       | congestive heart failure/diagnosis     |
| 1951 | digitalis and preparations              | congestive heart failure/pathology     | cor pulmonale                          |
| 1950 | digitalis and preparations              | diuresis and diuretics                 | sodium chloride                        |
| 1949 | heart/insufficiency                     | diuresis and diuretics                 | venae cavae/surgery                    |
| 1948 | heart/failure                           | heart/insufficiency                    | heart/physiology                       |
| 1947 | heart/insufficiency                     | heart/failure                          | diuresis and diuretics                 |

---

Only the top three of the most frequent keywords are displayed.
